# Supplementary material for: Exploring the relative bending of a CVD graphene monolayer with gap-plasmons
Source: Royal Society of Chemistry journal article supplement (doi:10.1039/c4nr01586j), 2014-07-09
Supplement: c4nr01586j1.pdf [file c4nr01586j1.pdf]

## Supporting material

# Exploring the Relative Bending Status of a CVD Graphene Monolayer with Gap-Plasmon

Young Hwan Min and Won-Hwa Park\*

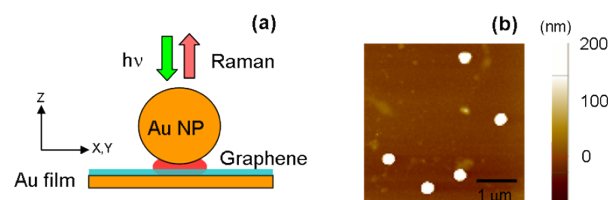

**Figure S1.** (a) Experimental setup and sample structure. The illumination and detection are carried out in the epi-direction using up-right microscope system. (b) Atomic Force Microscope (AFM) image of Au NP-graphene-Au film system

Figure S1(a) shows the experimental configuration. A gold thin-film with thickness of 10 nm is formed on a cleaned glass substrate by thermal evaporation. The separate Atomic Force Microscope (AFM) measurement found the typical rms roughness of the film to be less than 0.2 nm. We employ a dry-transfer process for the graphene film using a soft substrate such as polymethyl methacrylate (PMMA) stamp.<sup>33</sup> Here we first attach the PMMA stamp to the CVD-grown graphene film on the Cu substrate. The Cu substrate can be etched away using  $\text{FeCl}_3$ , leaving the adhered graphene film on the PMMA substrate. After cleaning with DI water, we can transfer a FLG film to the Au substrate. After transferring graphene onto the Au film, a drop of Au colloidal nanoparticle solution (nominal diameter  $\sim 200$  nm, BB International) is applied ( $\sim 15$   $\mu\text{L}$ ) onto the graphene-Au film, followed by rinsing and air-drying at ambient temperature. Figure S1(b) shows the AFM image of Au NP-graphene-Au film system.

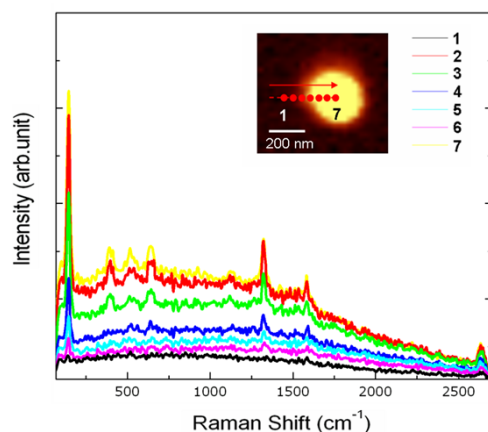

**Figure S2.** (a) SERS spectra obtained from #1 to #7 domains shown in the inset image. Bright circle type shows the SERS image gated at LBM peak.(inset) Note that the only LBM peak is started to emerge abruptly at low-wavenumber region. ( $< 700$   $\text{cm}^{-1}$ )

Figure S2 shows the SERS spectra of FLG along with the numbered axis from inset image. The number of graphene layer may be deduced nearly 5 layers considering the LBM peak position.<sup>35</sup> From #1 to #7, the Raman intensities of each phonon mode are enhanced with the accompanied background as approaching to the center of the junction. The #1 point, where uttermost region from Au NP, exhibits narrowly weak 2D and G mode Raman signal. By approaching the target point to closer to the center of Au NP, Raman signal enhancement of 2D, G and D modes is clearly observed due to electromagnetic (EM) enhancement effect. Specifically, the Raman mode, observed at  $\sim 150$   $\text{cm}^{-1}$  with Full Width at Half Maximum (FWHM) of  $\sim 16$   $\text{cm}^{-1}$  is newly observed with very high signal-to-noise ratio, which is not observed at conventional Raman spectrum at bare Au film or  $\text{SiO}_2/\text{Si}$  substrate as well. Previously, the graphene Raman peak at low-wavenumber ( $< 700$   $\text{cm}^{-1}$ ) was studied at a few groups. Chun Hung Lui et al reported a comprehensive determination of the different LBM frequencies for FLG by means of the two-phonon overtone spectra observed in doubly resonant Raman spectroscopy from two to 20 layers over the spectral range of  $80 \sim 300$   $\text{cm}^{-1}$ .<sup>34</sup> In particular, the Raman peak at  $\sim 150$   $\text{cm}^{-1}$  at Figure 4 from ref 35 maybe coincided with our Raman peak at  $\sim 150$   $\text{cm}^{-1}$ . Previously, we could assign that the low-wavenumber SERS peaks were associated with the out-of-plane layer breathing mode (LBM) at the near zone center region and we could interpret that the strongly observed SERS signal at  $\sim 150$   $\text{cm}^{-1}$  is ascribed to the LBM of the a FLG.<sup>26,34</sup>

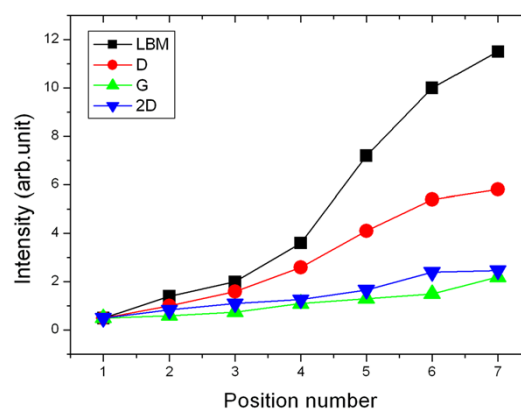

**Figure S3.** Lateral approach profiles of each phonon mode of FLG from #1 to #7. Dramatic enhancement of SERS intensity from LBM is observed rather than G and 2D modes.

Figure S3 shows the SERS intensity approach profiles of each phonon modes of the FLG from #1 to #7 direction. Interestingly, it is clearly distinguished that approach profiles are phonon mode-dependent. First of all, the enhancement of the SERS intensities of 2D and G modes along with the #1 to #7 is not significantly enhanced, while the LBM mode shows the relatively large increase of SERS intensities along with the #1 to #7 direction than the 2D and G modes. The G mode is associated with the doubly degenerate ( $i\text{TO}$  and  $\text{LO}$ ) phonon mode ( $E_{2g}$  symmetry) at the Brillouin zone center and the vibration is *in-plane* direction. On the other hand, LBM is one of the representative *out-of-plane* phonon modes. It gives us

that the observed LBM mode is considerably and sensitively influenced by the local z-field formed at the near-center of the Au NP-Au film junction in terms of coinciding between z-polarized incident and the LBM phonon axis, leading to dramatic Raman enhancement. However, the G and 2D modes whose vibration is in-plane do not significantly be affected by the incident z-field relatively. Note that D mode shows the moderate SERS enhancement feature. It is well-known that SP<sup>3</sup>-type defects are generally displayed as D mode.<sup>10</sup> Not only for in-plane but also out-of-plane defect such as functional group bonding maybe partially influential, resulting in the moderate SERS enhancement of D mode along the z-axis.<sup>34</sup> The SERS enhancement factor per area (nm<sup>2</sup>) at Au NP-Au film can be calculated by dividing I(#7) to I(#1) considering the corresponded each focused spot area. The focused area at I(#7) is defined as  $\sim \lambda_{\text{exc}}/2\text{NA}$  while that of the I(#1) can be obtained approximately by the electro-dynamic simulation via Finite Different Time Domain (FDTD) method.<sup>35</sup> Table S1 shows the summarized mode-dependent SERS enhancement factor (EF) per area.

**Table S1.** Mode-dependent SERS enhancement factor per area (nm<sup>2</sup>)

|                        | LBM                    | G                      | 2D                     |
|------------------------|------------------------|------------------------|------------------------|
| EF (/nm <sup>2</sup> ) | $\sim 3.0 \times 10^3$ | $\sim 5.5 \times 10^2$ | $\sim 6.4 \times 10^2$ |

To conclude, we present that Raman enhancement of a FLG of each phonon mode sandwiched at Au NPs-Au film junctions is different and can be ascribed to the different incident polarization. Closer to the center of the junction, LBM shows dramatic Raman enhancement than the 2D and G modes in terms of coinciding between the z-polarized incident field formed at Au NP-Au film junction and the LBM phonon axis, which can also be quantified that the SERS enhancement factor of the LBM is more than  $\sim 5.5$  times larger than that of the G and 2D modes.

## References

- 1 A. K. Geim, K. S. Novoselov, *Nat. Materials*. **2007**, 6, 183.
- 2 K. S. Novoselov, A. K. Geim, S. V. Morozov, D. Jiang, Y. Zhang, S. V. Dubonos, I. V. Grigorieva, A. A. Firsov, *Science*. **2006**, 306, 666
- 3 A. A. Balandin, S. Ghosh, W. Bao, I. Calizo, D. Teweldebrhan, F. Mian, C. N. Lau, *Nano Lett.* **2008**, 8, 902
- 4 X. Li, W. Cai, J. An, S. Kim, J. Nah, D. Yang, R. Piner, A. Velamakanni, I. Jung, E. Tutuc, S. K. Banerjee, L. Colombo, R. S. Ruoff, *Science*. **2009**, 324, 1312
- 5 S. Bae, H. Kim, Y. Lee, X. Xu, J.-S. Park, Y. Zheng, J. Balakrishnan, T. Lei, H. R. Kim, Y. I. Song, Y.-J. Kim, K. S. Kim, B. Ozyilmaz, J.-H. Ahn, B. H. Hong, S. Iijima, *Nat. Nanotechnol.* **2010**, 5, 574
- 6 J. A. Robinson, C. P. Puls, N. E. Staley, J. P. Stitt, M. A. Fanton, K. V. Emtsev, T. Seyller, Y. Liu, *Nano. Lett.* **2009**, 9, 964
- 7 W.-H. Park, M. Jung, W. Park, J.-S. Moon, S. Noh, T. H. Kim, M. Joo, K. Park, *Appl. Phys. Lett.* **2013**, 103, 033107
- 8 S. Banerjee, M. Sardar, N. Gayathri, A. K. Tyagi, R. Baldev, *Appl. Phys. Lett.* **2006**, 88, 062111
- 9 M. Ahmad, S. A. Han, D. H. Tien, J. Jung, Y. Seo, *J. Appl. Phys.* **2011**, 110, 054307
- 10 A. Eckmann, A. Felten, A. Mishchenko, L. Britnell, R. Krupke, K. S. Novoselov, and C. Casiraghi. *Nano. Lett.* **2012**, 12, 3925
- 11 Nicklow, R.; Wakabayashi, N.; Smith, H. G. *Phys. Rev. B*. **1972**, 5, 4951
- 12 M. Mohr, J. Maultzsch, E. Dobardžić, S. Reich, I. Milošević, M. Damjanović, A. Bosak, M. Krisch, and C. Thomsen, *C. Phys. Rev. B*. **2007**, 76, 035439
- 13 C. Spudat, M. Müller, L. Houben, J. Maultzsch, K. Goss, C. Thomsen, C. M. Schneider and C. Meyer, *Nano Lett.* **2010**, 10, 4470
- 14 D. Levshov, T. X. Than, R. Arenal, V. N. Popov, R. Parret, M. Paillet, V. Jourdain, A. A. Zahab, T. Michel, Y. I. Yuzyuk, and J.-L. Sauvajo, *Nano Lett.* **2011**, 11, 4800
- 15 S. Kitipornchai, X. Q. He, and K. M. Liew, *Phys. Rev. B*. **2005**, 72, 075443
- 16 K. Saha, U. V. Waghmare, H. R. Krishnamurthy, and A. K. Sood, *Phys. Rev. B*. **2007**, 78, 165421
- 17 J.-W. Jiang, H. Tang, B.-S. Wang, and Z.-B. Su, *Phys. Rev. B*. **2008**, 77, 235421
- 18 K. H. Michel, and B. Verberck, *Phys. Rev. B*. **2008**, 78, 085424
- 19 H. Wang, Y. F. Wang, X. W. Cao, M. Feng, and G. X. Lan, *J. Raman Spectrosc.* **2009**, 40, 1791
- 20 L. J. Karssemeijer, and A. Fasolino, *A. Surf. Sci.* **2011**, 605, 1611
- 21 K. H. Michel, and B. Verberck, *Phys. Rev. B*. **2012**, 85, 094303
- 22 F. Herziger, P. May, and J. Maultzsch, *J. Phys. Rev. B*. **2012**, 85, 235447
- 23 K. Sato, J. S. Park, R. Saito, C. Cong, T. Yu, C. H. Lui, T. F. Heinz, G. Dresselhaus, and M. S. Dresselhaus, *Phys. Rev. B*. **2011**, 84, 035419
- 24 C. H. Lui, L. M. Malar, S. Kim, G. Lantz, F. E. Laverge, R. Saito, and T. F. Heinz, *Nano Lett.* **2012**, 12, 5539
- 25 J. Shang, C. Cong, J. Zhang, Q. Xiong, G. G. Gurzadyana and T. Yu, *J. Raman Spectrosc.* **2012**, 44, 70
- 26 W.-H. Park, M. Jung, J.-S. Moon, S. Noh, T. H. Kim, M. Joo, K. Park, *Appl. Phys. Lett.* **2013**, 103, 071903
- 27 Y. Fang, Y. Huang, *Appl. Phys. Lett.* **2013**, 102, 153108
- 28 J. Chen, W. Yang, K. Dick, K. Deppert, H. Q. Xu, L. Samuelson, and H. Xu, *Appl. Phys. Lett.* **2008**, 92, 093110
- 29 G. Braun, S. J. Lee, M. Dante, T.-Q. Nguyen, M. Moskovitz, N. Reich, *J. Am. Chem. Soc.* **2007**, 129, 6378
- 30 K. Kim, J. K. Yoon, *J. Phys. Chem. B*. **2005**, 109, 20731
- 31 J. Zheng, Y. Zhou, X. Li, Y. Ji, Y. Y. Lu, R. Gu, *Langmuir*. **2003**, 19, 632
- 32 W.-H. Park, S.-H. Ahn, Z. H. Kim, *ChemPhysChem*. **2008**, 9, 2491
- 33 K. S. Kim, Y. Zhao, H. Jang, S. Y. Lee, J. M. Kim, K. S. Kim, J.-H. Ahn, P. Kim, J.-Y. Choi, B. H. Hong, *Nature*. **2009**, 457, 706
- 34 C. H. Lui, T. F. Heinz, *Phys. Rev. B*. **2013**, 87, 121404(R)
- 35 W.-H. Park, Z. H. Kim, *Nano Lett.* **2010**, 10, 4040
